# Supplementary material
Source: publisher site journal article supplement (https://www.kjim.org/upload/media/kjim-2017-318-suppl1.pdf)
Supplement: Supplementary file 1 [file kjim-2017-318-suppl1.pdf]

**Supplementary Table 1. Diagnostic performance of pp65 and IE1 specific ELISPOT assay for prediction of significant CMV antigenemia or tissue-invasive CMV disease**

| Variable <sup>a</sup>                                              | CMV infection rates |                                   | p value | Sensitivity and specificity, %<br>(95% CI) |
|--------------------------------------------------------------------|---------------------|-----------------------------------|---------|--------------------------------------------|
|                                                                    | No. of patients (%) | No. of CMV<br>infection cases (%) |         |                                            |
| KT recipients who underwent ELISPOT<br>before transplant (n = 133) | 133                 | 11 (8)                            |         |                                            |
| pp65-specific ELISPOT                                              |                     |                                   |         |                                            |
| Negative ELISPOT results ( $\leq 5$ ) <sup>b</sup>                 | 26 (20)             | 4 (15)                            | 0.22    | Sensitivity 36 (11–69)                     |
| Positive ELISPOT results ( $> 5$ ) <sup>b</sup>                    | 107 (81)            | 7 (7)                             |         | Specificity 82 (74–88)                     |
| IE1-specific ELISPOT                                               |                     |                                   |         |                                            |
| Negative ELISPOT results ( $\leq 6$ ) <sup>b</sup>                 | 94 (71)             | 9 (10)                            | 0.51    | Sensitivity 82 (48–98)                     |
| Positive ELISPOT results ( $> 6$ ) <sup>b</sup>                    | 39 (29)             | 2 (5)                             |         | Specificity 30 (22–39)                     |

ELISPOT, enzyme-linked immunospot; CMV, cytomegalovirus; CI, confidence interval; KT, kidney transplant.

<sup>a</sup>ELISPOT results are expressed as number of spots/ $2.0 \times 10^5$  peripheral blood mononuclear cells.

<sup>b</sup>The optimal cut-off point were determined by estimating the maximum Youden's index (*J*). *J* is the vertical distance between the receiver operating characteristics (ROC) curves and the diagonal or chance line.
